# Supplementary material for: Influence of microwave hydrothermal reaction factor on the morphology of NaY(MoO4)2 nano-/micro-structures and luminescence properties of NaY(MoO4)2:Tb3+
Source: Royal Society of Chemistry journal article supplement (doi:10.1039/c5ra06915g), 2015-01-01
Supplement: c5ra06915g1.pdf [file c5ra06915g1.pdf]

## Electronic Supplementary Information

### Influence of microwave hydrothermal reaction factor on morphology of $\text{NaY}(\text{MoO}_4)_2$ nano-/micro- structures and luminescence properties of $\text{NaY}(\text{MoO}_4)_2:\text{Tb}^{3+}$

Hui Zheng<sup>1,2</sup>, Baojiu Chen<sup>\*1</sup>, Hongquan Yu<sup>\*2</sup>, Jiashi Sun<sup>1</sup>, Xiangping Li<sup>1</sup>, Jinsu Zhang<sup>1</sup>, Hua Zhong<sup>1</sup>,

Zhongli Wu<sup>1</sup> and Haiping Xia<sup>3</sup>

<sup>1</sup> Department of Physics, Dalian Maritime University, Dalian 116026, People's Republic of China. Email: [chenmbj@sohu.com](mailto:chenmbj@sohu.com)

<sup>2</sup> College of Environmental and Chemical Engineering, Dalian Jiaotong University, Dalian 116028, People's Republic of China. Email: [yuhq7808@djtu.edu.cn](mailto:yuhq7808@djtu.edu.cn)

<sup>3</sup> Key laboratory of Photo-electronic Materials, Ningbo University, Ningbo, 315211, People's Republic of China  
Email: [hpxcm@nbu.edu.cn](mailto:hpxcm@nbu.edu.cn)

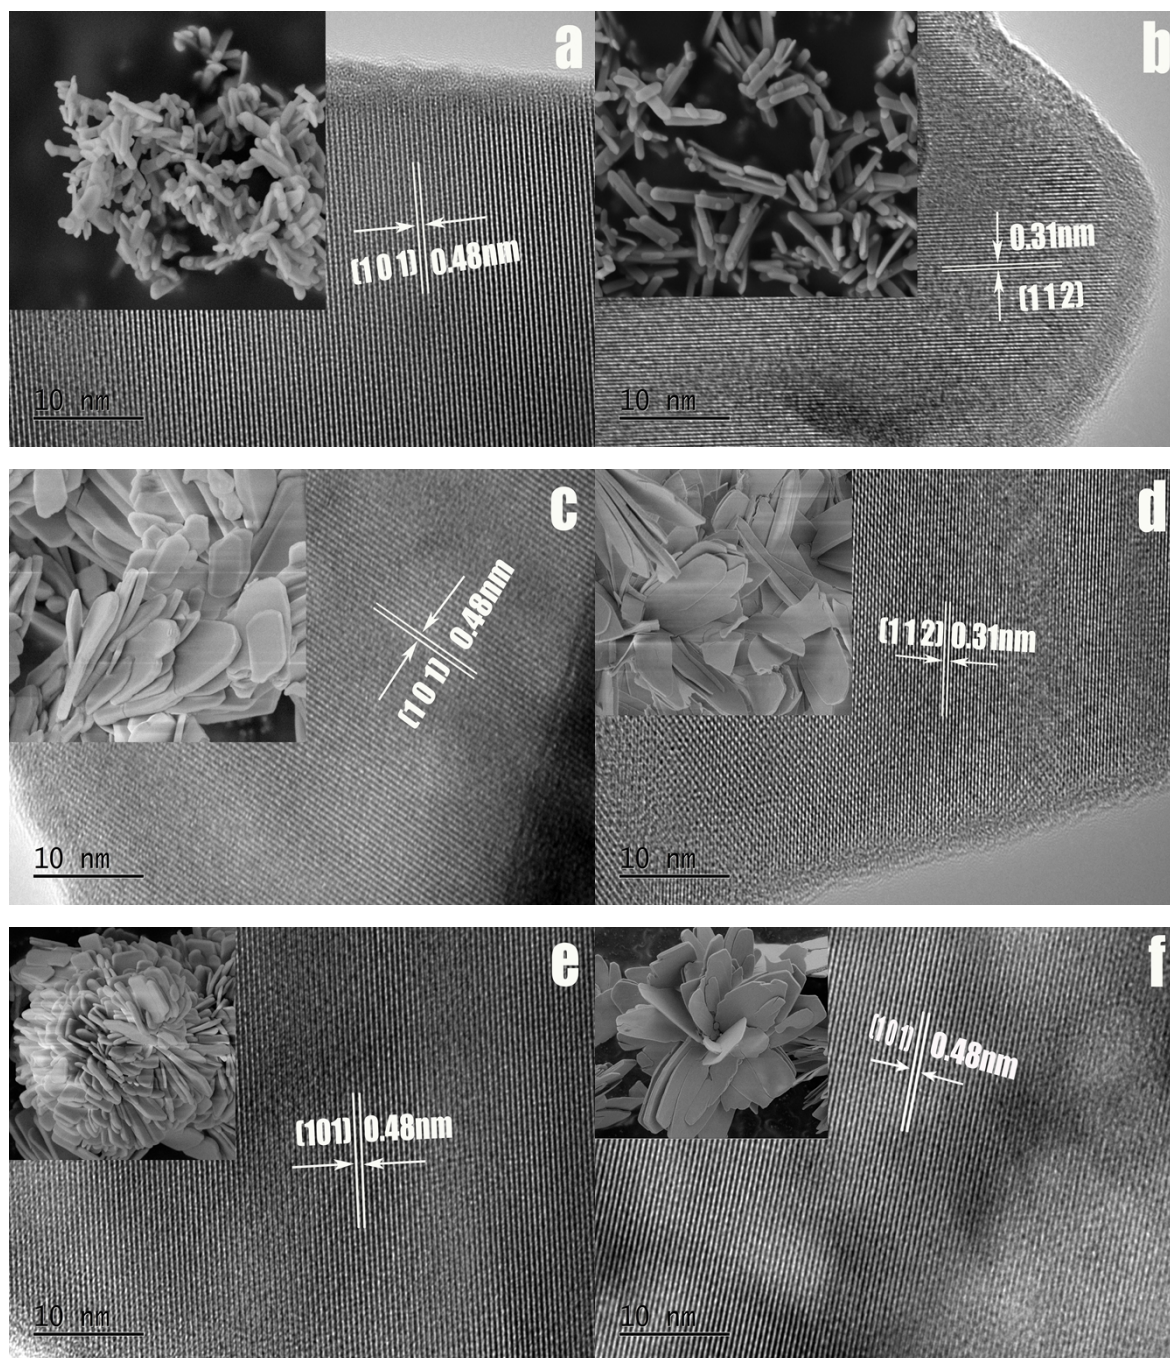

**Figure S1** HRTEM images of samples prepared with different  $\text{Cit}^{3-}/\text{MoO}_4^{2-}/\text{Ln}^{3+}$ : (a) 0.5/2/1, (b) 1/2/1, (c) 1.5/2/1, (d) 2/2/1, (e) 1.5/3/1, (f) 2/4/1.  $\text{Ln}^{3+}$  represents 2 mmol lanthanide ions (1.9 mmol  $\text{Y}(\text{NO}_3)_3$  and 0.1 mmol  $\text{Tb}(\text{NO}_3)_3$ ). The insets are the morphology of these samples.

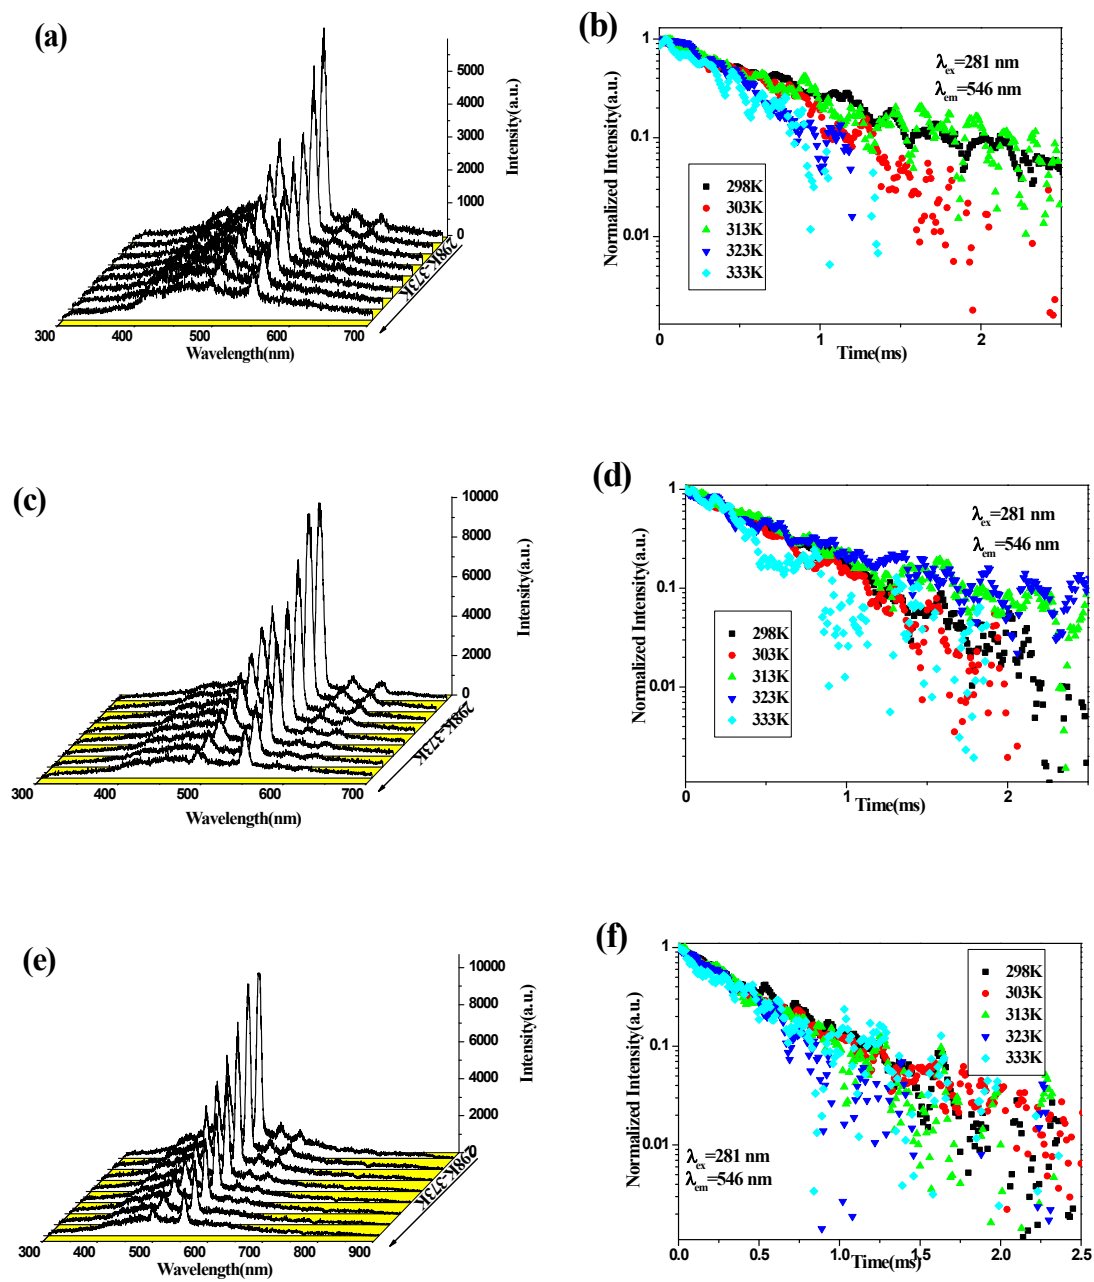

**Figure S2** (a), (c), (e) Emission spectra ( $\lambda_{ex}=281\text{nm}$ ) and (b), (d), (f) fluorescent decays of the sample with Cit<sup>3-</sup>/ Ln<sup>3+</sup> molar ratio of 1, 1.5 and 2 at different temperatures.
